# Supplementary material for: Relationship between melatonin receptor 1B and insulin receptor substrate 1 polymorphisms with gestational diabetes mellitus: a systematic review and meta-analysis
Source: PubMed Central journal article supplement — Sci Rep. 2014 Aug 22;4:6113. doi: 10.1038/srep06113 (PMC4141258; doi:10.1038/srep06113), 2014-08-22
Supplement: srep06113-s1.pdf [file srep06113-s1.pdf]

**Relationship between melatonin receptor 1B and insulin receptor  
substrate 1 polymorphisms with gestational diabetes mellitus: a  
systematic review and meta-analysis**

**Yan Zhang<sup>1#</sup>, Cheng-Ming Sun<sup>2#</sup>, Xiang-Qin Hu<sup>3</sup>, Yue Zhao<sup>1\*</sup>**

1. School of Nursing, Tianjin Medical University, Tianjin, 300070, P.R., China.

2. Department of Clinical Laboratory, Yuhuangding Hospital, Yantai, 264000, P.R., China.

3. Tianjin Central Hospital of Gynecology and Obstetrics, Tianjin, 300100, P.R., China.

#Contributed equally to this study

\*Corresponding Author: Yue ZHAO

Yue ZHAO, PhD, Professor, School of Nursing, Tianjin Medical University, 22 Qixiangtai Road,  
Heping District, Tianjin 300070, P.R., China.

Tel: +86-22-83336590

Fax: +86-22-83336900.

Email: yuezhao\_1@163.com

**Table S1 Meta-analysis of genetic polymorphisms in GDM**

|                                | Fixed-effects model |          |      |                | Random-effects model |         |      |                |
|--------------------------------|---------------------|----------|------|----------------|----------------------|---------|------|----------------|
|                                | OR (95% CI)         | P-value  | P-H  | I <sup>2</sup> | OR (95% CI)          | P-value | P-H  | I <sup>2</sup> |
| <b>MTNR1B rs10830963 (C/G)</b> |                     |          |      |                |                      |         |      |                |
| G vs. C                        | 1.24 (1.14, 1.35)   | <0.00001 | 0.10 | 48%            | 1.27 (1.12, 1.45)    | 0.0003  | 0.10 | 48%            |
| GG vs. CC                      | 1.53 (1.30, 1.80)   | <0.00001 | 0.19 | 35%            | 1.57 (1.25, 1.97)    | <0.0001 | 0.19 | 35%            |
| GG+GC vs. CC                   | 1.30 (1.14, 1.47)   | <0.0001  | 0.39 | 3%             | 1.30 (1.14, 1.48)    | <0.0001 | 0.39 | 3%             |
| GG vs. GC+CC                   | 1.37 (1.19, 1.57)   | <0.0001  | 0.13 | 44%            | 1.42 (1.14, 1.76)    | 0.002   | 0.13 | 44%            |
| <b>MTNR1B rs1387153 (C/T)</b>  |                     |          |      |                |                      |         |      |                |
| T vs. C                        | 1.26 (1.12, 1.43)   | 0.0002   | 0.74 | 0%             | 1.26 (1.12, 1.43)    | 0.0002  | 0.74 | 0%             |
| TT vs. CC                      | 1.56 (1.23, 1.99)   | 0.0003   | 0.87 | 0%             | 1.56 (1.23, 1.99)    | 0.0003  | 0.87 | 0%             |
| TT+TC vs. CC                   | 1.33 (1.10, 1.61)   | 0.003    | 0.51 | 0%             | 1.33 (1.10, 1.61)    | 0.003   | 0.51 | 0%             |
| TT vs. TC+CC                   | 1.36 (1.11, 1.68)   | 0.003    | 0.88 | 0%             | 1.36 (1.11, 1.68)    | 0.003   | 0.88 | 0%             |
| <b>IRS1 rs1801278 (C/T)</b>    |                     |          |      |                |                      |         |      |                |
| T vs. C                        | 1.42 (1.15, 1.75)   | 0.001    | 0.09 | 50%            | 1.53 (1.98, 2.15)    | 0.02    | 0.09 | 50%            |
| TT vs. CC                      | 3.82 (1.70, 8.55)   | 0.001    | 0.54 | 0%             | 3.40 (1.48, 7.83)    | 0.004   | 0.54 | 0%             |
| TT+TC vs. CC                   | 1.36 (1.08, 1.72)   | 0.009    | 0.05 | 57%            | 1.54 (1.02, 2.32)    | 0.04    | 0.05 | 57%            |
| TT vs. TC+CC                   | 3.01 (1.38, 6.56)   | 0.006    | 0.38 | 2%             | 2.69 (1.16, 6.26)    | 0.02    | 0.38 | 2%             |
| <b>P-H, P-heterogeneity</b>    |                     |          |      |                |                      |         |      |                |

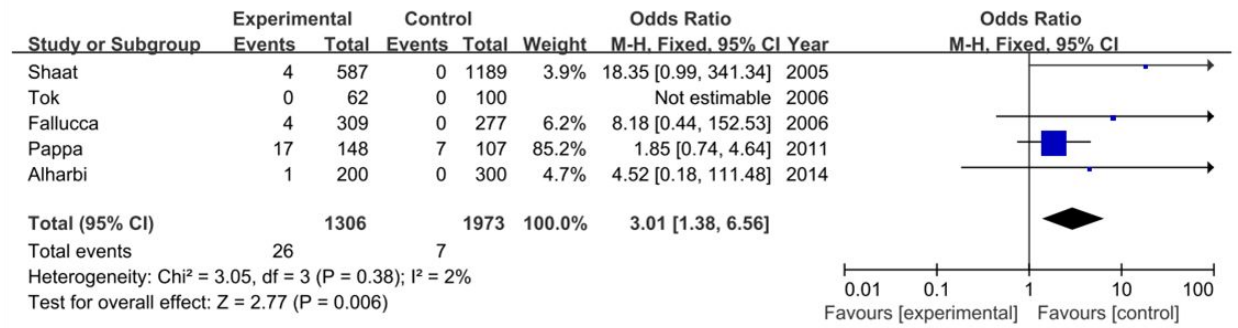

**Fig.S1 Meta-analysis of the association between recessive model (TT vs. TC+CC) of IRS1 rs1801278 polymorphism and risk for GDM**

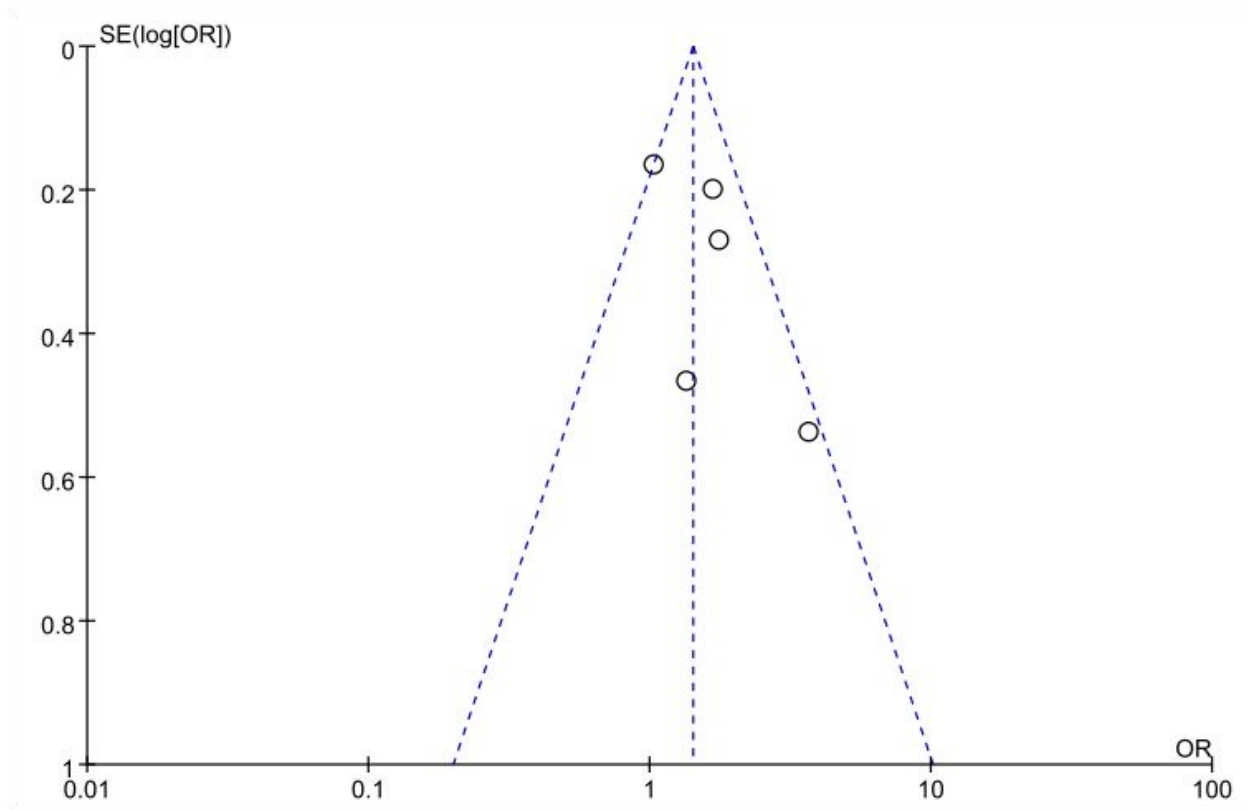

**Fig.S2 Funnel plot on the association for allelic model (T vs. C) of IRS1 rs1801278 and GDM risk in a fixed-effects model (P=0.149 for Egger's test)**
